# Supplementary material for: Equine pegiviruses cause persistent infection of bone marrow and are not associated with hepatitis
Source: PubMed Central journal article supplement (PMC7375656; doi:10.1371/journal.ppat.1008677), 2020-07-10
Supplement: ppat.1008677.s009.pdf [file ppat.1008677.s009.pdf]

**Tomlinson, Wolfisberg et al.: Equine pegiviruses cause persistent infection of bone marrow and are not associated with hepatitis**

**S3 Table.** Comparison of C35 consensus clone sequence.

| Position | AA change | KC410872 | Consensus<br>(# clones) | pC35 clone |
|----------|-----------|----------|-------------------------|------------|
| 587      | UTR       | T        | TT (4/7)                | TT         |
| 798      | nc        | C        | T                       | T          |
| 801      | nc        | T        | C                       | C          |
| 2523     | nc        | T        | C                       | C          |
| 2697     | nc        | C        | T                       | T          |
| 2712     | nc        | T        | C                       | C          |
| 3777     | nc        | T        | C                       | C          |
| 3969     | nc        | C        | T                       | T          |
| 4648     | nc        | C        | T                       | T          |
| 4677     | nc        | A        | G                       | G          |
| 4968     | nc        | C        | T                       | T          |
| 6696     | nc        | C        | T                       | T          |
| 7950     | nc        | A        | G                       | G          |
| 9231     | nc        | C        | T                       | T          |
| 9312     | nc        | A        | G                       | G          |
| 9314     | Q → R     | A        | G                       | G          |
| 9792     | nc        | G        | A                       | A          |
| 9925     | nc        | T        | C                       | C          |
| 10062    | nc        | A        | G                       | G          |
| 10586    | UTR       | C        | T                       | T          |
